# Supplementary material for: Incidental nanoparticles in black tea alleviate DSS-induced ulcerative colitis in BALB/c mice
Source: Royal Society of Chemistry journal article supplement (doi:10.1039/d3fo00641g), 2023-01-01
Supplement: d3fo00641g1.pdf [file d3fo00641g1.pdf]

1 Supplementary materials

2

3

4 **Figure S1.** The particle size and protein composition of tea NPs obtained after Chromatographic  
5 separation. A: Chromatographic separation of NPs from black tea infusion by SEC. B: Reducing  
6 SDS-PAGE images of black tea NPs. C: The particle size distribution of NPs from the black tea  
7 infusion. D: The morphology of tea NPs by TEM.

8 **Figure S2.** The expression of cell junction proteins in correspondence to intestinal inflammations.

9 The proteins include E-cadherin, ZO-1, Claudin-1, STAT3 and p-STAT3.

10

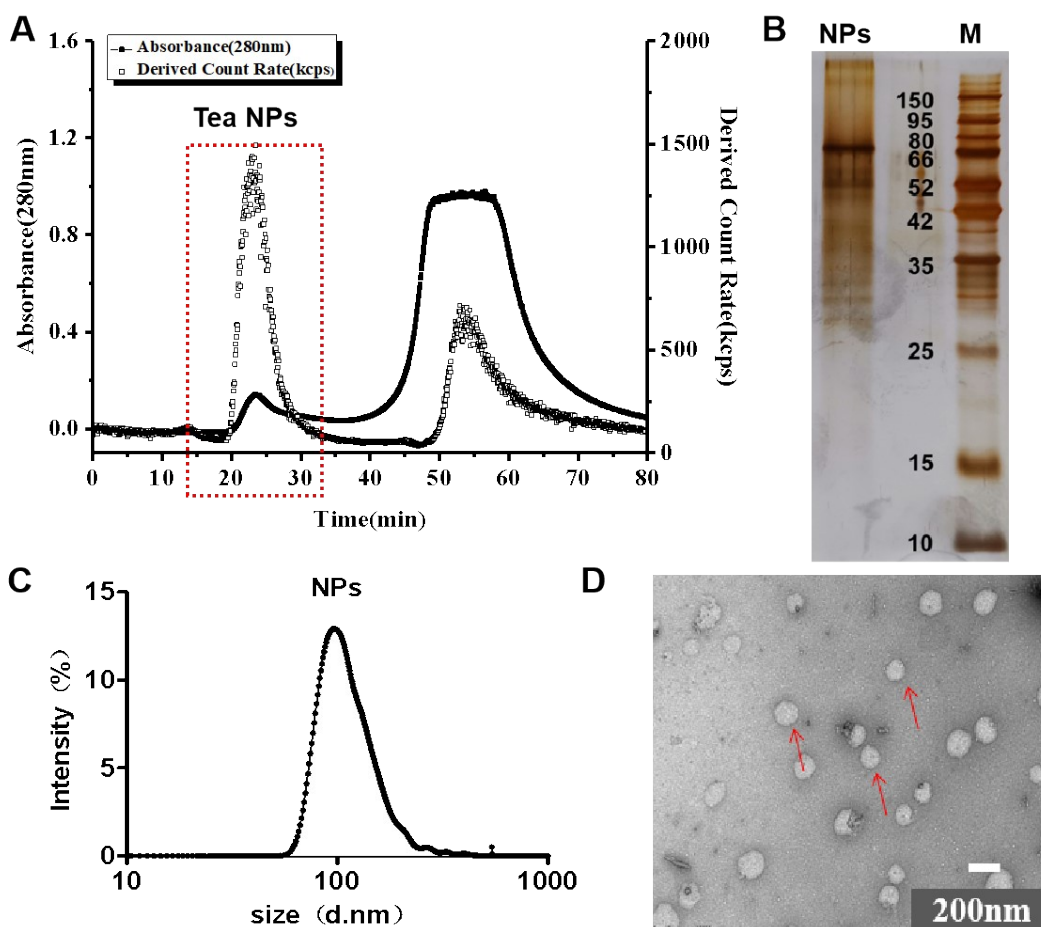

11

12

Figure S1

13 **TABLES**

14 **Table S1.** (a) The properties of black tea NPs

| Sample       | PDI            | Hydrodynamic Diameter | Derived count rate | $\zeta$ -potential | Particle number               |
|--------------|----------------|-----------------------|--------------------|--------------------|-------------------------------|
|              |                | nm                    | kcps               | mV                 | $\times 10^{10}$ particles/mg |
| NPs          | 0.2 $\pm$ 0.01 | 187 $\pm$ 7           | 12850 $\pm$ 576    | -32.4 $\pm$ 2.5    | 4.0 $\pm$ 0.1                 |
| Tea infusion | 0.2 $\pm$ 0.02 | 186 $\pm$ 4           | 3614 $\pm$ 96      | -27.5 $\pm$ 3.7    | 1.1 $\pm$ 0.1                 |

15

16 (b) Compositions of nanoparticles derived from black tea infusion

| Black tea NPs | Proteins       | Carbohydrates | Polyphenols  | EGCG          | CAF           | GA          | ECG         |
|---------------|----------------|---------------|--------------|---------------|---------------|-------------|-------------|
| ( $\mu$ g/mg) | 865 $\pm$ 52.5 | 87 $\pm$ 5.2  | 48 $\pm$ 1.1 | 4.8 $\pm$ 0.1 | 2.6 $\pm$ 0.1 | 1.5 $\pm$ 0 | 0.7 $\pm$ 0 |
| %             | 86.5           | 8.7           | 4.8          | 0.48          | 0.26          | 0.15        | 0.07        |

17 %: W/W, dry weight.

18

19

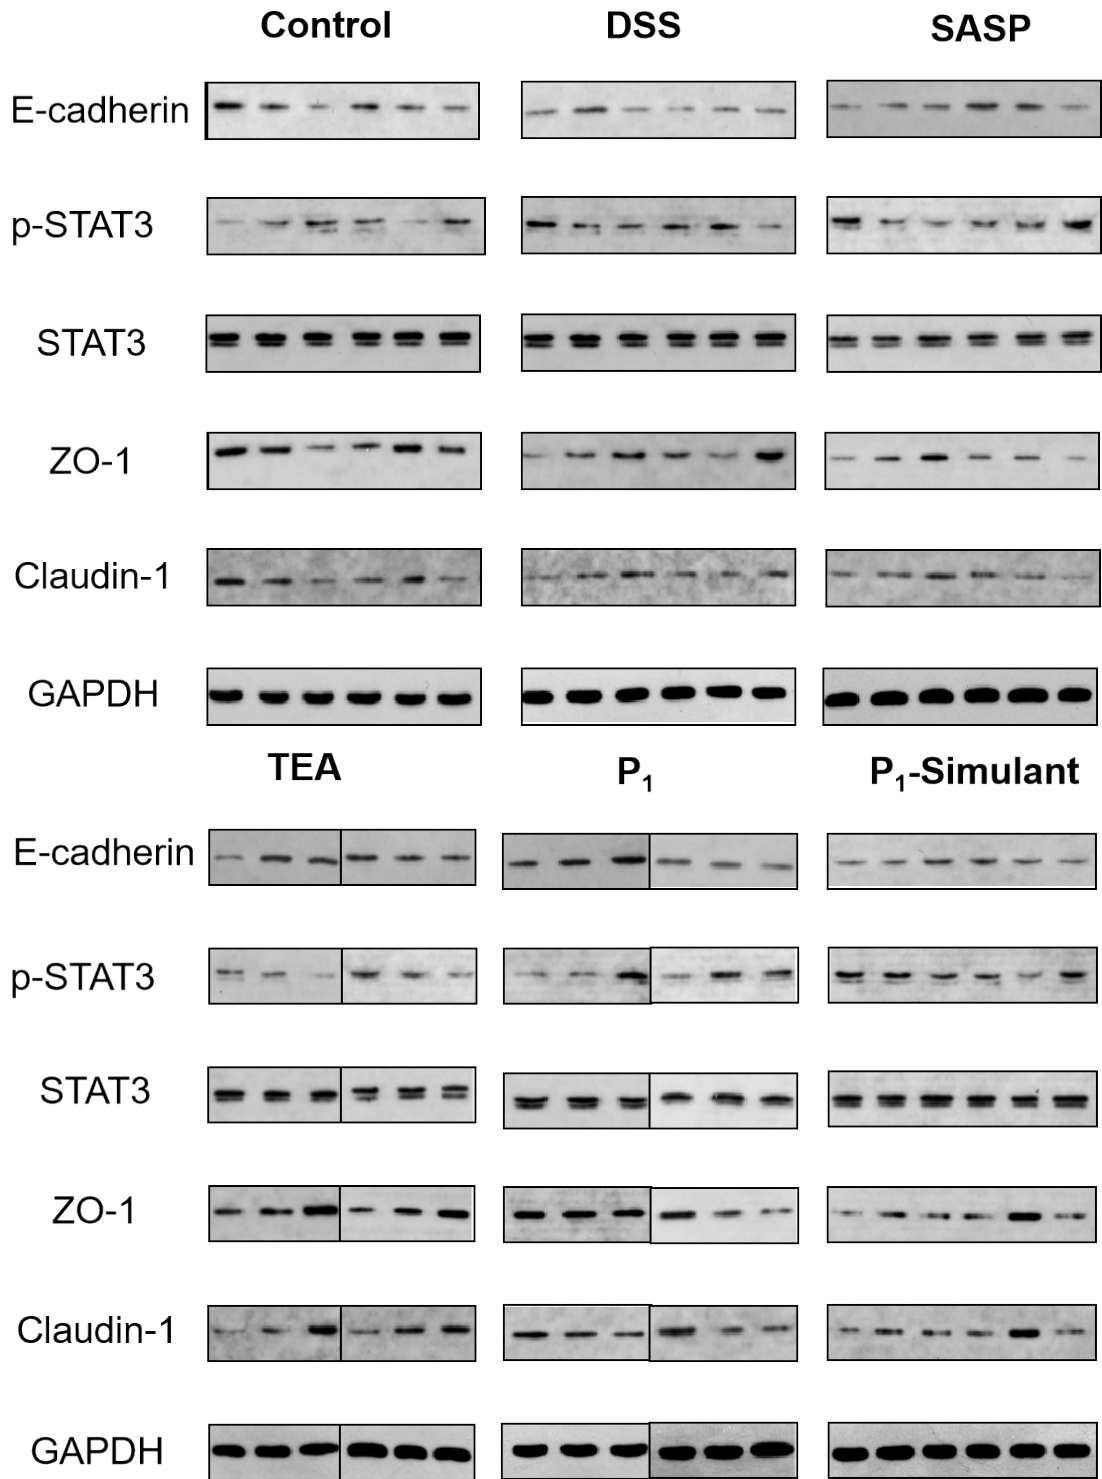

20

21

22

23

Figure S2
